# 1 **The impact of size on particle drainage dynamics and antibody** 2 **response**

3 Simon Zinkhan<sup>1\*</sup>, Anete Ogrina<sup>2\*</sup>, Ina Balke<sup>2</sup>, Gunta Reseviča<sup>2</sup>, Andris Zeltins<sup>2</sup>,  
4 Simone de Brot<sup>3</sup>, Cyrill Lipp<sup>1</sup>, Xinyue Chang<sup>1</sup>, Lisha Zha<sup>4</sup>, Monique Vogel<sup>1</sup>, Martin F.  
5 Bachmann<sup>1,5</sup>, Mona O. Mohsen<sup>1,6\*\*</sup>

## 7 **Affiliations:**

8 <sup>1</sup> Department of BioMedical Research, University of Bern, Bern, Switzerland; Department of  
9 Immunology RIA, University Hospital Bern, Bern, Switzerland

10 <sup>2</sup> Latvian Biomedical Research & Study Centre, Ratsupites iela 1, Riga, LV 1067, Latvia

11 <sup>3</sup> COMPATH, Institute of Animal Pathology, University of Bern, Bern, Switzerland

12 <sup>4</sup> International Immunology Center, Anhui Agricultural University, Hefei, Anhui, China.

13 <sup>5</sup> Jenner Institute, Nuffield Department of Medicine, University of Oxford, UK

14 <sup>6</sup> Interim Translational Research Institute "iTRI", National Center for Cancer Care & Research  
15 Doha, Qatar

16  
17 \* Both authors contributed equally to this study

18 \*\* Correspondence to: Mona O. Mohsen. Email: [mona.mohsen@dbmr.unibe.ch](mailto:mona.mohsen@dbmr.unibe.ch)

19  
20 **Keywords:** virus-like particles, cowpea chlorotic mottle virus, humoral immune  
21 response

## 23 **Abstract**

24 Vaccine-induced immune response can be greatly enhanced by mimicking pathogen  
25 properties. The size and the repetitive geometric shape of virus-like particles (VLPs) influence  
26 their immunogenicity by facilitating drainage to secondary lymphoid organs and enhancing  
27 interaction with and activation of B-cells and other innate humoral immune components. VLPs  
28 derived from the plant Bromovirus genus, specifically cowpea chlorotic mottle virus (CCMV),  
29 are T=3 icosahedron particles. They can be easily expressed in an *E. coli* host system and  
30 package ssRNA during the expression process. Recently, we have engineered CCMV-VLPs  
31 by incorporating the universal tetanus toxoid (TT) epitope at the N-terminus. The modified  
32 CCMV<sub>TT</sub>-VLPs successfully form icosahedral particles  $T=3$ , with a diameter of ~30nm  
33 analogous to the parental VLPs. Interestingly, incorporating TT epitope at the C-terminus of  
34 CCMV<sub>TT</sub>-VLPs results in the formation of Rod-shaped VLPs, ~1µm in length and ~30nm in  
35 width. In this study, we have investigated the draining kinetics and immunogenicity of both  
36 engineered forms (termed as Round-shaped CCMV<sub>TT</sub>-VLPs and Rod-shaped CCMV<sub>TT</sub>-VLPs)  
37 as potential B cell immunogens using different *in vitro* and *in vivo* assays. Our results reveal  
38 that Round-shaped CCMV<sub>TT</sub>-VLPs are more efficient in draining to secondary lymphoid organs  
39 to charge antigen-presenting cells as well as B-cells. Furthermore, compared to Rod-shaped  
40 CCMV<sub>TT</sub>-VLPs, Round-shaped CCMV<sub>TT</sub>-VLPs led to more than 100-fold increased systemic  
41 IgG and IgA responses accompanied by prominent formation of splenic germinal centers.  
42 Round-shaped CCMV<sub>TT</sub>-VLPs could also polarize the induced immune response towards TH<sub>1</sub>.  
43 Up to our knowledge, this is the first study investigating and comparing the draining kinetics

44 and immunogenicity of one and the same VLP monomer forming nano-sized icosahedrons or  
45 rods in the micrometer size.  
46

## 47 **Introduction**

48 In 1956, Crick and Watson have stated that “it is a striking fact that almost all small  
49 viruses are rods or spheres”, “These shells are constructed from a large number of identical  
50 protein molecules, of small or moderate size, packed together in a regular manner” (1). The  
51 main reason for this arrangement is the small genome of viruses, especially RNA viruses. The  
52 coat protein (CP) of many viruses is made up of multiple copies arranged in an icosahedron  
53 or a helical-shaped geometry (2, 3). The icosahedral structure of viruses is more prevalent  
54 than the helical-shaped one.

55 Virus-like particles (VLPs) have emerged in the last few decades as a premium vaccine  
56 platform due to several reasons including: being a safe platform lacking replicating genetic  
57 materials, their repetitive surface geometry that serves as a potent pathogen-associated  
58 structural pattern (PASP), their ability to package different toll-like receptor ligands (TLRs), the  
59 feasibility in coupling different epitopes and most importantly their favorable size ranging  
60 between 20-200nm (4). Such size allows VLPs to rapidly and efficiently filter and drain through  
61 the conduit system and gain access to lymphoid follicles (4-7). The approved VLP-based  
62 vaccines currently on the market mostly exhibit an icosahedral surface geometry based on the  
63 quasi-equivalence concept described by Caspar and Klug in 1962 and expressed as  
64 *Triangulation (T)* (8, 9). For example, human papilloma viruses (HPVs) are  $T=7$  of ~60nm in  
65 size (10), while hepatitis E virus (HEV) VLPs are  $T=1$  of ~25nm (11). The different generations  
66 of hepatitis B virus (HBV) vaccines show highly organized sub-viral particles (SVPs) of ~20-  
67 25nm (12). In contrast, the arrangement of CPs of VLPs in helical or rod-shape geometry is  
68 also possible; tobacco-mosaic virus (TMV) is a well characterized representative of this  
69 category. Virions of TMV are ~300nm in length and ~18nm in width (13, 14). TMV-VLPs have  
70 been investigated as a promising platform in nanotechnology (15) and as a vaccine platform  
71 as well (16). Nevertheless, knowledge is scarce regarding TMV-VLPs drainage dynamics.  
72 Icosahedral VLPs can be manipulated by inserting few mutations to form rod-shaped VLP.  
73 For example, VLPs derived from the bacteriophage Q $\beta$  can assemble in a rod-shaped particle  
74 following the mutation of five amino acid (a.a.) residues in the FG loop of its CP (17).

75 It is known that the repetitive surface geometry of icosahedral VLPs enhances optimal  
76 induction of B-cell response via cross-linking of B-cell receptors (BCRs) (18, 19). Previously,  
77 we have shown that displaying epitopes on icosahedral  $T=3$  VLPs such as bacteriophage Q $\beta$   
78 or plant-derived CuMV<sub>TT</sub> VLPs result in high specific IgG antibody (Ab) titers as well as  
79 neutralizing Abs (20-25). Some studies have revealed that a vaccine based on rod-shaped  
80 tobacco-mosaic (TMV)-VLPs could also serve as an effective platform to display different  
81 epitopes capable of eliciting an immune response against different pathogens (26, 27).

82 Cowpea chlorotic mottle virus (CCMV) is a Bromovirus naturally infecting plants and  
83 therefore is non-infectious to humans. The infected plants develop yellow spots on their

84 leaves, hence termed chlorotic (28). The virus is an icosahedron  $T=3$  of ~28nm in diameter,  
85 consisting of 180 sequentially identical CPs. The coat protein can adopt multiple quasi-  
86 equivalent forms referred to as the coat subunits A, B and C forming either hexamers  
87 (alternating subunits B and C) or pentamers (subunit A). The resulting virus particle consists  
88 of 12 pentamers and 20 hexamers (29). Previously, it has been shown that icosahedral CCMV  
89 can be converted into rod-shaped particles after a disassembly/reassembly process (30).

90 In this study, we have demonstrated that CCMV-derived VLPs of different morphology  
91 (icosahedral or rod-shaped structure) can be obtained directly from recombinant *E.coli* cells.  
92 We specifically manipulated CCMV-VLPs by inserting the universal tetanus toxoid (TT)  
93 epitope at the C or N-terminus to form icosahedral VLPs in the nanometer scale or rod-shaped  
94 VLPs with sizes in the micron range. Such intervention allowed us to study the impact of size  
95 on particles in terms of drainage dynamic and magnitude of induced immune response using  
96 VLPs based on essentially the same VLP-monomer. Our results demonstrate for the first time  
97 that VLPs in the nm size range are vastly more immunogenic than micron-sized particles.

98

## 99 **Materials and methods:**

### 100 **Round-shaped and Rod-shaped CCMV<sub>TT</sub>-VLPs cloning, expression and production**

101 Cloning of CCMV-CP with induced tetanus toxoid epitope for expression: A cloned copy of the  
102 CCMV coat protein gene (wt *CP*) was obtained from Dr. Alain Tissot (Zürich) and used in PCR  
103 mutagenesis for insertion of the coding sequence of tetanus toxoid epitope (TT830 – 843;  
104 QYIKANSFIGITE) in 5'- and 3'- terminal ends of the CP gene. To replace the original amino  
105 acids at the N-terminus of CCMV CP with the TT epitope sequence, the pET42-CCMVwt  
106 plasmid was used as a template for PCR amplification and mutagenesis. *NdeI* site at the 5'end  
107 of the CCMVwt gene was used for cloning corresponding PCR products. To introduce the  
108 tetanus toxoid epitope coding sequence into the CCMV-wt gene, two step PCR mutagenesis  
109 was necessary. For the first step amplification the following primers were used for N terminal  
110 PCR:

111 CC\_N83\_d24F (5'ATACATATGGGCCAGTATATTAAGGCCAACTCCAAATTTATCGGGATTACCGA 3') and  
112 CC\_N83R (5' AGTTAACTTCCCTGTACCGACTGTTTCGGTAATCCCGATAAATTTGGAGTTG 3').

114 For the second round the PCR products from the first round were diluted 1:50 and re-amplified  
115 with primers CC\_N83\_d24F and CC\_AgeR (5' ACTTCGATACGCTGTAACCGGTCCA 3').

116 For C terminal insertion of TT epitope the following primers were used: CC\_C83F (5'  
117 TGACGACTCTTTCCTCCGGTCTATGGCCAGTATATTAAGGCCAACTCC 3') and  
118 CC\_C83R (5' TTAAGGCTTACTCGGTAATCCCGATAAATTTGGAGTTG 3').

119 Second round of the PCR was performed as describe above using primers CC\_C83R (5'

120 TTA<sub>2</sub>CTCGAGAAGCTTATTACTCGGTAATCCCGATAAATTTGGAGTTG 3') and CC\_SacIIIF  
121 (5' CCCTTGAACAACACTCGCCGCGGA 3').

122 The corresponding PCR fragments were analysed in 0.8% agarose gel and then purified using  
123 the *GeneJet Gel Extraction* kit (Thermo Fischer Scientific, Waltham, Massachusetts). Then  
124 the 5' terminal end PCR product and plasmid pET42-CCMVwt were digested with enzymes  
125 *NdeI* and *BshTI* (Thermo Fischer Scientific, Waltham, Massachusetts) and ligated, resulting  
126 in plasmid pET42-CCMV-Ntt830. The 3'terminal end PCR product and plasmid pET42-  
127 CCMVt were digested with enzymes *Cfr42I* and *XhoI* (Thermo Fischer Scientific, Waltham,  
128 Massachusetts) and ligated, resulting in plasmid pET42-CCMV-Ctt830.

129 *E.coli* XL1-Blue cells were used as a host for cloning and plasmid amplification. To avoid PCR  
130 errors several CP gene-containing pET42 plasmid clones were sequenced using the BigDye  
131 cycle sequencing kit and an ABI Prism 3100 Genetic analyzer (Applied Biosystems, Carlsbad,  
132 USA). After sequencing, the plasmid clones without sequence errors were chosen for further  
133 experiments.

134 Cloning of CCMV-SS-CP with induced tetanus toxoid epitope for expression: To obtain "salt-  
135 stable" CCMV VLPs, the replacement of lysine against arginine in position 42 (K42R) was  
136 necessary. For CCMVwt-SS the following primers were used: CCP\_salt\_AgeI\_R (5'  
137 TGTAACCGGTCCATGCTTTAATAGCGCGGCCTT 3') and CCM\_NdeF (5'  
138 ATACATATGTCTACAGTCGGTACAGGG 3'). For CCMV-Ntt830-SS the following primers  
139 were used: CC\_N83\_d24F and CC\_salt\_AgeI\_R. The corresponding PCR products were  
140 cloned into the pTZ57R/T vector (Thermo Fischer Scientific, Waltham, Massachusetts). *E.*  
141 *coli* XL1-Blue cells were used as a host for cloning and plasmid amplification. To avoid RT-  
142 PCR errors, several CP gene-containing pTZ57 plasmid clones were sequenced using the  
143 BigDye cycle sequencing kit and an ABI Prism 3100 Genetic analyser (Applied Biosystems,  
144 Foster City, California). After sequencing, corresponding DNA fragments without sequence  
145 errors were subcloned into the *NdeI/AgeI* sites of pET42-CCMVwt and pET42-CCMV-Ntt830  
146 expression vectors, resulting in the expression plasmids pET42-CCMV-SS and pET42-  
147 CCMV-Ntt830-SS. For C terminal tetanus toxoid CCMV-SS construct the corresponding  
148 *NdeI/BsrGI*-fragment from pET42-CCMV-SS was subcloned into pET-CCMV-Ctt830,  
149 generating the expression vector pET42-CCMV-Ctt830-SS.

150 Expression and purification of CCMV-SS VLPs: To obtain all salt stable CCMV CP VLPs, each  
151 construct was transformed and expressed in *E. coli* C2566 cells (New England Biolabs,  
152 Ipswich, USA). After selection of clones with the highest expression levels of the target  
153 protein, *E. coli* cultures were grown in 2xTY medium containing kanamycin (25 mg/l) on a  
154 rotary shaker (200 rev/min; Infors, Bottmingen, Switzerland) at 30°C to an OD<sub>600</sub> of 0.8–  
155 1.0. Then, expression was induced with 0.2 mM Isopropyl-β-D-thiogalactopyranoside (IPTG),  
156 and the medium was supplemented with 5 mM MgCl<sub>2</sub> and 2 mM CaCl<sub>2</sub>. Incubation was

157 continued on the rotary shaker at 20°C for 18 h. The resulting biomass was collected by low-  
158 speed centrifugation and was frozen at -70°C. After thawing on ice, the cells were suspended  
159 in buffer containing 15 mM sodium phosphate pH 7.5 supplemented with 150 mM NaCl (buffer  
160 A) with additional 0.5 mM urea, 1 mM PMSF, 5 mM mercapto-ethanol, and were disrupted by  
161 ultrasonic treatment. Insoluble proteins and cell debris were removed by centrifugation  
162 (13,000 rpm, 30 min at 5°C). All steps involved in the expression of VLP were monitored by  
163 SDS-PAGE using 12.5% gels.

164 CCMV-SS and CCMV-Ctt830-SS VLPs were separated from cellular proteins by  
165 ultracentrifugation (SW28 rotor, Beckman, Palo Alto, USA; at 25,000 rpm, 6 h, 5°C) in a  
166 sucrose gradient (20–60% sucrose in buffer A, without mercapto-ethanol and urea,  
167 supplemented with 0.5% Triton X-100). The content of gradient tubes was divided into six  
168 fractions, starting at the bottom of the gradient, and the fractions were analysed by SDS-  
169 PAGE. Fractions containing CCMV-SS CP proteins were combined and dialyzed against 100  
170 volumes of buffer A to remove the sucrose. If necessary, samples were concentrated using  
171 an Amicon Ultra-15 centrifugal device (Millipore, Cork, Ireland).

172 However, soluble proteins of CCMV-Ntt830-SS were precipitated using a mixture of PEG  
173 8,000 (8%) and NaCl (0.15 M), collected by centrifugation and dissolved in buffer A. PEG/NaCl  
174 precipitation was repeated for CCMV-Ntt830-SS. After solubilisation or dialysis (in case of  
175 CCMV-SS), all CCMV CP preparations were purified two times using an ultracentrifuge and  
176 30% sucrose cushion – first with additional 0.5% Triton X-100 and the second time without  
177 Triton X-100 (4 h, 50 000 rmp, 4°C; Type 70Ti rotor, Beckman) and the pellet was then  
178 dissolved in buffer A. If necessary, samples were concentrated using an Amicon Ultra-15  
179 centrifugal device (Millipore, Cork, Ireland). To obtain pure preparations of CCMV-CPs for  
180 subsequent electron microscopy (EM) analysis, stability and immunological studies, the  
181 sucrose gradient, dialysis, and concentration steps were repeated.

182 All steps involved in the expression and purification of VLP were monitored by SDS-PAGE  
183 (using 12.5% gels). The concentration of purified CCMV-CPs were estimated using the QuBit  
184 fluorometer in accordance with manufacturer's recommendations (Invitrogen, Carlsbad,  
185 California). Concentrated VLP solutions were stored at +4°C.

### 186 **Electron microscopy**

187 Purified Round-shaped or Rod-shaped CCMV<sub>TT</sub>-VLPs proteins (1 mg/ml) were adsorbed on  
188 carbon formvar-coated copper grids and were negatively stained with 0.5% uranyl acetate  
189 aqueous solution. The grids were examined using a JEM-1230 electron microscope (JEOL,  
190 Tokyo, Japan) at an accelerating voltage of 100 kV.

### 191 **Mass Spectrometry**

192 Wild type CCMV<sub>TT</sub>-VLPs, Round or Rod-shaped CCMV<sub>TT</sub>-VLPs (1 mg/ml in buffer A) were  
193 diluted with a 2,5-Dihydroxyacetophenone (2,5-DHAPI) matrix solution and were spotted onto

194 an MTP AnchorChip 400/384TF. Matrix assisted laser desorption/ionization (MALDI)-TOF MS  
195 analysis was carried out on an Autoflex MS (Bruker Scientific, Billerica, Massachusetts). The  
196 protein molecular mass (MM) calibration standard II (22.3–66.5 kDa; Bruker, Billerica,  
197 Massachusetts) was used for mass determination.

#### 198 **SDS-Page and gel electrophoresis**

199 SDS-Page: 6µg of Round or Rod-shaped CCMV<sub>TT</sub>-VLPs were mixed with 2x mercaptoethanol  
200 and heated at 95°C for 3 minutes and then loaded into Any kD Mini-PROTEAN TGX precast  
201 protein gels (BIO-RAD). Gel was run for 35min at 180V. As reference Page Ruler<sup>TM</sup> Prestained  
202 Protein Ladder was used (Thermo Fisher Scientific, Waltham, Massachusetts). Gel  
203 electrophoresis: 10µg of Round- or Rod-shaped CCMV<sub>TT</sub>-VLPs were loaded on a 1% agarose  
204 gel. Nucleic acids were visualized using Cybr Safe DNA Gel Stain (Life Technologies,  
205 Carlsbad, California). 5µl Quick-Load Purple 1 kb DNA ladder (New England Biolabs, Ipswich,  
206 Massachusetts) was used as reference. Gel was run for 30min at 100V.

#### 207 **Mice**

208 Wild type C57BL/6 mice were purchased from Harlan. All *in vivo* experiments were performed  
209 using 8-12 weeks old female mice. All animal procedures were conducted in accordance with  
210 the Swiss Animal Act (455.109.1 – September 2008, 5<sup>th</sup>).

#### 211 **Vaccination regimen**

212 Wild type C57BL/6 mice (8-12 weeks, Harlan) were vaccinated subcutaneously (SC) with  
213 15µg Round or Rod-shaped CCMV<sub>TT</sub>-VLPs in 100µl PBS on day 0. Mice were boosted with a  
214 identical dose on day 14. Serum samples were collected on days 0, 7, 14, 21, 28 and 35.

#### 215 **The enzyme-linked immunosorbent assay (ELISA)**

216 For determination of total IgG antibody titers against Round and Rod-shaped CCMV<sub>TT</sub>-VLPs  
217 in sera of immunized mice, ELISA plates (Nunc Immuno MaxiSorp, Rochester, NY) were  
218 coated over night with Round or Rod-shaped CCMV<sub>TT</sub>-VLPs, respectively. Plates were  
219 washed with PBS-0.01%Tween and blocked using 100µl PBS-Casein 0.15% for 2h. Sera from  
220 immunized mice were diluted 1/20 initially and a 1/3 dilution chain was performed. Plates were  
221 incubated for 1h at 37°C. After washing with PBS-0.01%Tween, goat anti-mouse IgG  
222 conjugated to Horseradish Peroxidase (HRP) (Jackson ImmunoResearch, West Grove,  
223 Pennsylvania) was added 1/1000 and incubated for 1h at 37°C. Plates were developed and  
224 OD 450 reading was performed.

225 IgG subclasses were measured from day 21 sera using the same ELISA protocol with the  
226 following secondary Abs: goat anti-mouse IgG1-HRP (BD Biosciences, San Jose, California),  
227 goat anti-mouse IgG2b-HRP (1:1000) (Thermo Fischer Scientific, Waltham, Massachusetts),  
228 goat anti-mouse IgG2c-HRP (Southern Biotech, Birmingham, Alabama) 1:4000, rat anti-  
229 mouse IgG3-biotin (Becton, Dickinson, Franklin Lakes, New Jersey) 1:2000 followed by  
230 streptavidin-HRP (Dako, Glostrup, Denmark) 1:1000 incubated at 37°C for 1h.

231 IgA was measured using day 35 sera (immunization at day 0, boost at day 14). IgG was  
232 depleted using Dynabeads™ Protein G (Thermo Fischer Scientific, Waltham, Massachusetts).  
233 Serum was diluted 1/20 (total volume of 75µl) in PBS-Casein 0.15%. 25µl beads were used  
234 per sample. Manufacturer's protocol was followed until step 3. of "Bind Antibody". Supernatant  
235 was added to ELISA plates and a 1/3 serial dilution was performed. For IgA detection, goat  
236 anti mouse IgA conjugated to HRP was used (ThermoFisher Scientific, Waltham,  
237 Massachusetts) 1/4000.

238 For OD50 calculations, if a sample did not reach the threshold a value of 1 was appointed.

### 239 **Measuring IFN- $\gamma$ in mouse serum**

240 Wild type C57BL/6 mice (8-12 weeks, Harlan) were vaccinated with 15µg Round or Rod-  
241 shaped CCMV<sub>TT</sub>-VLPs on day 0 and boosted on day 14. Serum from vaccinated mice was  
242 collected for measuring IFN- $\gamma$ . ELISA MAX™ Deluxe Set Mouse IFN- $\gamma$  (Biolegend, San  
243 Diego, California) was performed according to manufacturer's instructions. Serum was used  
244 undiluted and concentration was interpolated to a standard curve of the sets standard sample.

### 245 **Trafficking of Round and Rod-shaped CCMV<sub>TT</sub>-VLPs to draining lymph nodes**

246 Round or Rod-shaped CCMV<sub>TT</sub>-VLPs were labelled with AF488 as per manufacturer's  
247 instructions (Thermo Fischer Scientific, Waltham, Massachusetts) and stored at -20°C. Wild  
248 type C57BL/6 mice (8-12 weeks, Harlan) were injected with 10µg of the VLPs in the footpad  
249 under isoflurane anesthesia. Popliteal LNs were collected 3h and 24h following footpad  
250 injection. Lymph nodes were treated with collagenase D (Roche, Basel, Switzerland) and  
251 DNase I (Boehringer, Ingelheim am Rheim, Germany) in DMEM medium containing 5% FBS  
252 and 1% Strep/Penicillin for 30 min at 37°C. Lymph nodes were smashed using 70µm cell  
253 strainers, RBC were lysed with ACK buffer. Cells were stained with Fc blocker and then with  
254 anti-CD11b, CD11c, CD45R/220, CD8 and F4/80 (all from Biolegend, San Diego, California).

### 255 **Immunofluorescence**

256 Round or Rod-shaped CCMV<sub>TT</sub>-VLPs were labelled with AF488 as per manufacturer's  
257 instructions (Thermo Fischer Scientific, Waltham, Massachusetts) and stored at -20°C. Wild  
258 type C57BL/6 mice (8-12 weeks, Harlan) were injected with 10µg of the VLPs in the footpad  
259 under isoflurane anesthesia. Popliteal LNs were collected 3h and 24h following footpad  
260 injection and embedded in Tissue-Tek optimum cutting temperature compound (Sakura)  
261 without prior fixation. Cryostat sections (7µm in thickness) on Superforst/Plus glass slides  
262 (Thermo Fischer Scientific, Waltham, Massachusetts) were air-dried overnight and then fixed  
263 for 10 min in ice-cold 100% acetone (PanReac). After rehydration (5 min in 1x PBS), sections  
264 were blocked with 1% (w/v) BSA (Sigma Aldrich, St. Louis, Missouri) and 1% (v/v) normal  
265 mouse serum. Immunofluorescence labeling was done with Abs diluted in PBS containing  
266 0.1% (w/v) BSA and 1% (v/v) normal mouse serum. Sections were washed 3 times for 5 min  
267 in 1x PBS after every labeling step. LN staining: macrophages were detected using a primary



268 antibody against CD11b (1/1000, rat anti mouse CD11b conjugated with PE; BD Biosciences,  
269 San Jose, California), B-cell follicles were identified using rat anti mouse B220 Alexa F647  
270 (1/1000; BD Biosciences, San Jose, California). Images were acquired on an Axioplan  
271 microscope using an AxioCam MRn (Zeiss).

### 272 **Histology of lymph node**

273 Round or Rod-shaped CCMV<sub>TT</sub>-VLPs were labelled with AF488 as per manufacturer's  
274 instructions (Thermo Fischer Scientific, Waltham, Massachusetts) and stored at -20. Wild type  
275 C57BL/6 mice (8-12 weeks, Harlan) were injected with 10µg of the VLPs in the footpad under  
276 isoflurane anesthesia. Popliteal LNs were collected 3h and 24h following footpad injection and  
277 fixed with 4% paraformaldehyde solution (Sigma Aldrich, St. Louis, Missouri). Of each group,  
278 two to four murine popliteal LNs were histologically examined by a board-certified veterinary  
279 pathologist (SdB). Of each LN, a full cross section, stained with Hematoxylin and Eosin (HE),  
280 was assessed for any histopathological changes.

### 281 **Statistical analysis**

282 Data were analyzed and presented as mean ± SEM using GraphPad PRISM 8. Comparison  
283 between the groups was performed using Student's *t*-test. *P*-values \*\*\*\**P* < 0.0001; \*\*\**P* <  
284 0.001; \*\**P* < 0.01; \**P* < 0.05.

285

### 286 **Results:**

#### 287 ***Directional insertion of tetanus toxoid (TT) epitope in the N or C-terminal results in*** 288 ***Round or Rod-shaped CCMV<sub>TT</sub>-VLPs***

289 In a first step, we engineered CCMV-VLPs derived from a non-human pathogenic plant  
290 virus by incorporating a powerful T-cell stimulatory epitope derived from tetanus toxoid (TT)  
291 (Tetanus toxin 830-843) at the N or C-terminus of CCMV-VLPs. The TT epitope was  
292 genetically fused to the capsid protein (CP) of CCMV-VLPs as has been previously described  
293 for our newly developed platform derived from cucumber-mosaic virus-like particles (CuMV<sub>TT</sub>-  
294 VLPs) (31). The introduced TT epitope is considered a universal epitope in humans as it is  
295 recognized by essentially all individuals. Since all individuals have been immunized against  
296 TT, memory Th cells may be able to help B cells to generate protective IgG even under more  
297 challenging conditions such as aged populations (31). CCMV-VLPs with insertion of TT  
298 epitope at the N-terminus retain their self-assembly as an icosahedron similar to the native  
299 virus. In contrast, insertion of TT epitope at the C-terminal end led to formation of Rod-shaped  
300 particles. Both Round and Rod-shaped CCMV-VLPs forms carry a lysine to arginine mutation  
301 at residue 42 (32). This mutation renders the VLPs less sensitive to pH and salt concentration,  
302 which is an advantage in *in vivo* environments (A. Zeltins, manuscript in preparation).  
303 Therefore, the engineered VLPs in this study are salt-stable (SS). The shape and integrity of  
304 the cloned VLPs were confirmed via electron microscopy which shows a size of ~30nm in

305 diameter for CCMV-Ntt-SS (Fig. 1a). The size of the CCMV<sub>TT</sub>-Ctt-SS greatly varies in length  
306 but can reach up to more than 1 $\mu$ m, with a width of about 30nm. Figure 1b shows a magnified  
307 image of CCMV<sub>TT</sub>-Ctt-SS VLPs for easy comparison of their width with the icosahedral  
308 CCMV<sub>TT</sub>-Ntt-SS VLPs in figure 1a. To reach a rather homogenous population, we performed  
309 sucrose gradient separation to focus on the long rods (Fig. 1c). For simplification we refer to  
310 the two forms of engineered CCMV<sub>TT</sub> in this paper as Round-shaped CCMV<sub>TT</sub>-VLPs (CCMV-  
311 Ntt-SS) and Rod-shaped CCMV<sub>TT</sub>-VLPs (CCMV-Ctt-SS).

312 To further characterize the two forms of CCMV<sub>TT</sub>, we performed mass spectrometry  
313 (MS). MS data revealed a molecular weight for the CP monomers of Round- and Rod-shaped  
314 CCMV<sub>TT</sub>-VLPs of roughly 21.8 and 21.9kDa, respectively (Fig. 1d). The original CCMV-SS  
315 (salt-stable CCMV without TT insertion) is formed by CPs of roughly 20.2kDa. Considering the  
316 weight of the TT 830-843 epitope of 1.611kDa the obtained data are consistent. Reducing  
317 SDS-page experiments confirmed these findings and showed bands for Round- and Rod-  
318 shaped CCMV<sub>TT</sub>-VLPs of equal height at the appropriate position (Fig. 1e).

319 Both engineered CCMV<sub>TT</sub>-VLPs were produced in an *E. coli* system. The VLPs  
320 packaged ssRNA derived from *E. coli* spontaneously, which serves as a potent TLR7/8 ligand.  
321 The concentration of RNA in both Round- and Rod-shaped CCMV<sub>TT</sub>-VLPs was similar when  
322 measured at 260nm. The RNA content of the Round-shaped CCMV<sub>TT</sub>-VLPs could also be  
323 visualized by agarose gel electrophoresis, however this was less efficient for the Rod-shaped  
324 CCMV<sub>TT</sub>-VLPs because most of the RNA staying in the slot based on the Rod-shaped  
325 CCMV<sub>TT</sub>-VLPs being unable to move through the gel (Fig. 1f).

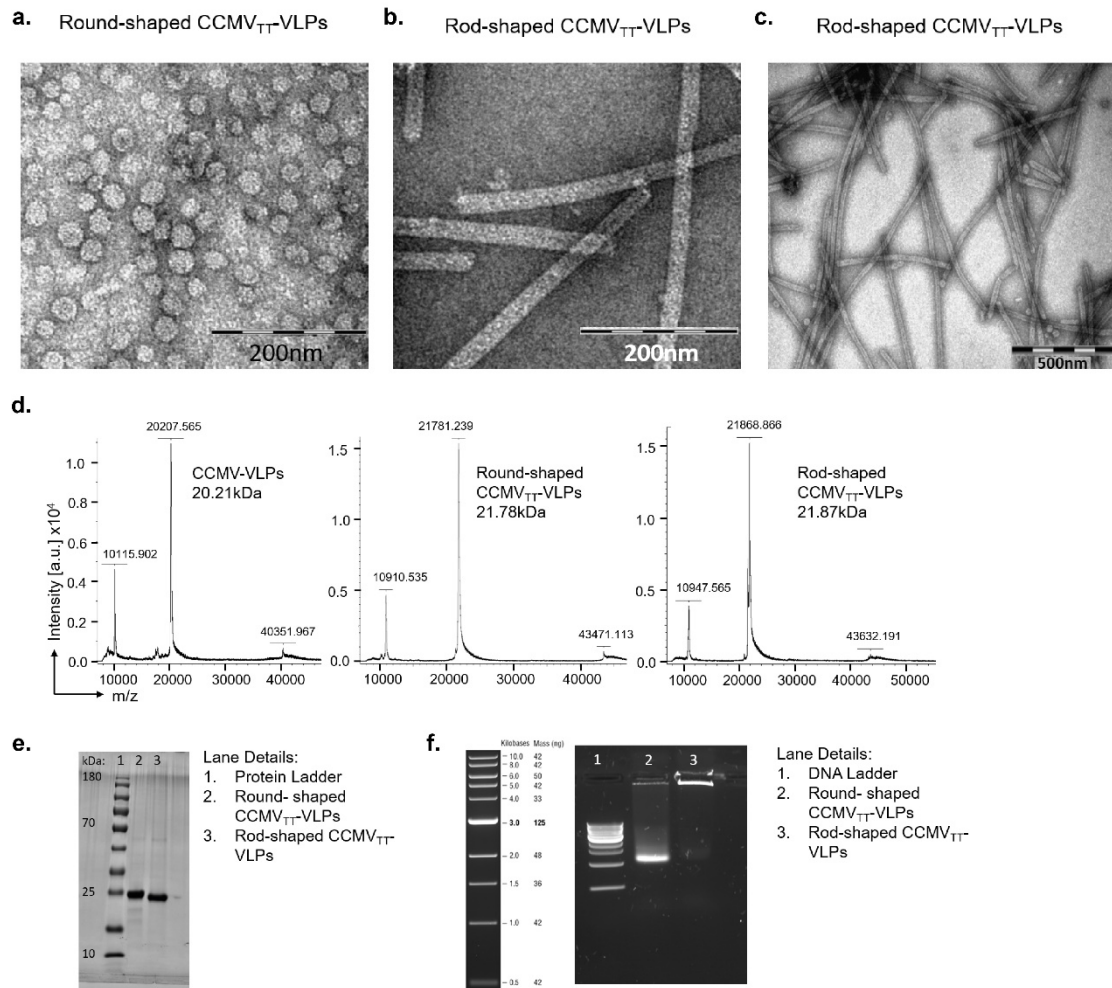

326

327

328

329

330

331

332

333

334

335

336

337

338

339

340

341

**Figure 1: Directional insertion of tetanus toxoid (TT) epitope in the N or C-terminal results in Round or Rod-shaped CCMV<sub>TT</sub>-VLPs.** **a**, EM of Round-shaped and **b./c.** Rod-shaped CCMV<sub>TT</sub>-VLPs, adsorbed on carbon grids and negatively stained with uranyl acetate solution, scale bars 200nm (Round) and 200nm/500nm (Rod). Round-shaped CCMV<sub>TT</sub>-VLPs are ~30nm in diameter, Rod-shaped CCMV<sub>TT</sub>-VLPs are ~1 $\mu$ m in length and ~30nm in width. **d**, Mass spectrometry data, from left to right: wild type CCMV<sub>TT</sub>-VLPs, Round-shaped CCMV<sub>TT</sub>-VLPs and Rod-shaped CCMV<sub>TT</sub>-VLPs. **e**, Reducing SDS-Page stained with Coomassie-blue stain, lane 1: protein marker, lane 2: Round-shaped CCMV<sub>TT</sub>, lane 3: Rod-shaped CCMV<sub>TT</sub>. **f**, Agarose gel stained with SYBR safe, lane 1: DNA ladder, lane 2: Round-shaped CCMV<sub>TT</sub>, lane 3: Rod-shaped CCMV<sub>TT</sub>.

**Round-shaped CCMV<sub>TT</sub>-VLPs exhibit faster and more efficient draining kinetics than Rod-shaped CCMV<sub>TT</sub>-VLPs in vivo**

To test the role of size and shape in lymphatic trafficking of the engineered VLPs, we assessed and visualized the accumulation of the AF488 labelled Round or Rod-shaped CCMV<sub>TT</sub>-VLPs in murine popliteal lymph nodes (LNs) 3h and 24h after injection in the

342 footpads. Flow cytometry data confirms that Round-shaped CCMV<sub>TT</sub>-VLPs were more efficient  
343 in reaching the popliteal LNs than the Rod-shaped ones. Such finding is not surprising as the  
344 round VLPs have a size of ~30nm in diameter allowing them to drain freely through the 200nm  
345 pores of the lymphatic vessels. Nevertheless, the Rod-shaped CCMV<sub>TT</sub>-VLPs were also  
346 capable of draining through the lymphatic vessels within 3 hours, despite their micro-size, this  
347 may be due to the fact that the width of the rods is ~30nm, similar to the diameter of the round-  
348 shaped CCMV<sub>TT</sub>-VLPs.

349 Next, we studied which type of APCs are involved in interacting with the Round and  
350 Rod-shaped CCMV<sub>TT</sub>-VLPs. Lymph node conventional dendritic cells (cDCs); CD8<sup>+</sup>CD11c<sup>+</sup>  
351 (Fig. 2a), CD8<sup>-</sup>CD11c<sup>+</sup> (Fig. 2b), macrophages CD11b<sup>+</sup>F4/80<sup>+</sup> (Fig. 2c), different myeloid cells  
352 populations CD45<sup>+</sup>CD11b<sup>+</sup> (Fig. 2d and h), neutrophils CD45<sup>+</sup> Ly6G<sup>+</sup> (Fig. 2e) and B cells  
353 CD45R/B220<sup>+</sup> (Fig. 2f and i) were more efficient in taking up Round-shaped than Rod-shaped  
354 CCMV<sub>TT</sub>-VLPs 3h after injection. No significant difference in the uptake between Round and  
355 Rod-shaped CCMV<sub>TT</sub>-VLPs has been seen at 24h except for B cells and the macrophage  
356 population characterized by CD11b<sup>+</sup>F4/80<sup>+</sup> (Fig. 2c). Interestingly, uptake by those  
357 macrophages was more prominent for Rod-shaped than Round-shaped CCMV<sub>TT</sub>-VLPs 24h  
358 post injection. This might result from delayed drainage of Rod-shaped CCMV<sub>TT</sub>-VLPs. B cells  
359 characterized by CD45R/B220<sup>+</sup> showed a very high frequency in taking up Round-shaped  
360 CCMV<sub>TT</sub>-VLPs in the popliteal LNs 3h and 24h after injection in the mouse footpad. B cells  
361 taking up CCMV<sub>TT</sub>-VLPs also showed expression of MHC-II (Fig. 2f and g). We next followed  
362 the arrival of the labelled CCMV<sub>TT</sub>-VLPs to the draining LNs by fluorescence microscopy of  
363 cryosections obtained from excised popliteal LNS at 3h and 24h post injection in the mouse  
364 footpad. The sections were co-stained with macrophage and B-cell markers, CD11b<sup>+</sup> and  
365 CD45<sup>+</sup>/B220<sup>+</sup>, respectively. The results demonstrate that AF488 Round-shaped CCMV<sub>TT</sub>-  
366 VLPs accumulated in large numbers in the subcapsular sinus area (SCS), the cortex and the  
367 medullary sinus (MS) of the popliteal LNs 3h post injection (Fig. 2j). Macrophages  
368 characterized with CD11b<sup>+</sup> were prominent 3h post injection with Round-shaped CCMV<sub>TT</sub>-  
369 VLPs at the SCS and MS. Rod-shaped CCMV<sub>TT</sub>-VLPs were less visible 3h at the popliteal LN  
370 post injection in the footpad and their presence was confined to the SCS with scarce VLPs in  
371 the cortex. 24h post injection, Round-shaped CCMV<sub>TT</sub>-VLPs were found deeper in the  
372 popliteal LN. Whereas, this observation was less obvious for the Rod-shaped CCMV<sub>TT</sub>-VLPs.  
373 B-cells were detectable 3h and 24h post injection of the VLPs in the mouse footpads. As the  
374 accumulation of Round-shaped CCMV<sub>TT</sub>-VLPs was prominent 3h post injection in the footpad,  
375 the B-cell signal was less noticeable. 24h later the accumulation of B-cells was more  
376 pronounced at the SCS and the cortical area of the LN upon injection of Round-shaped  
377 CCMV<sub>TT</sub>-VLPs than after injection with Rod-shaped CCMV<sub>TT</sub>-VLPs.

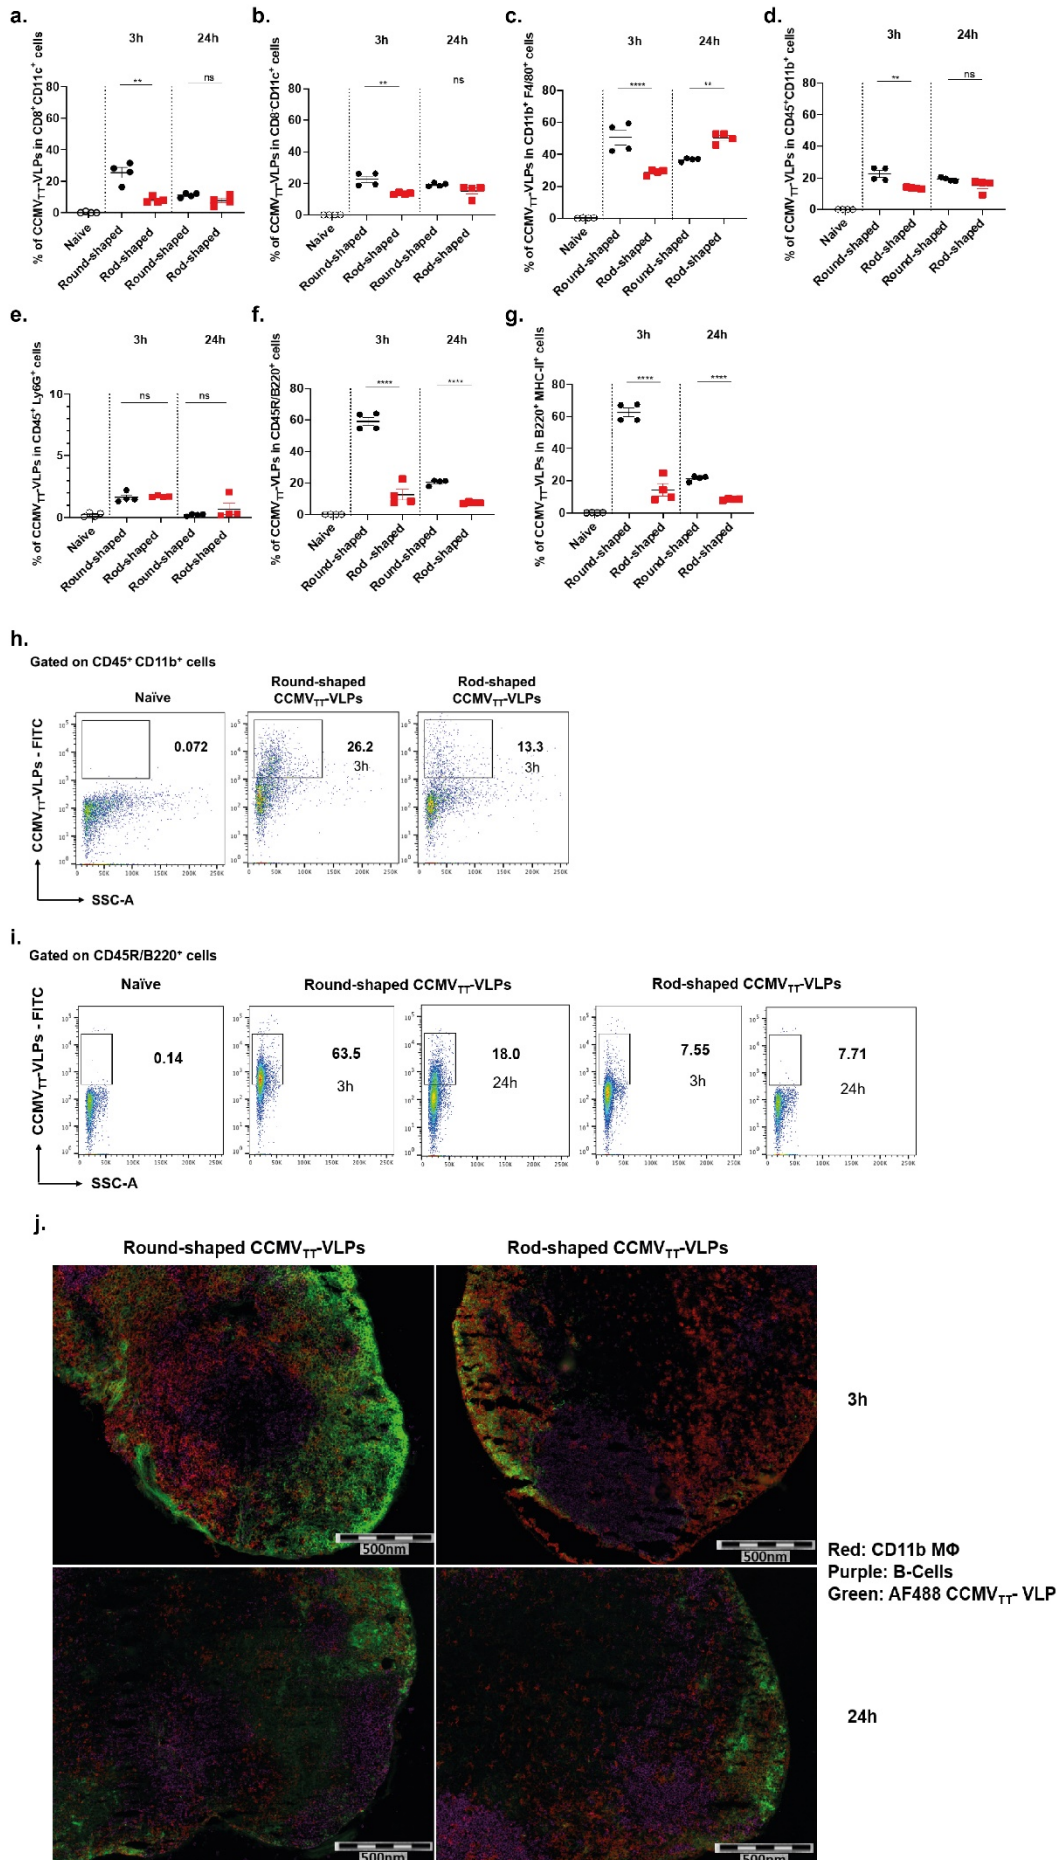

379 **Figure 2: Round-shaped CCMV<sub>TT</sub>-VLPs exhibit faster and more efficient draining kinetics than**  
380 **Rod-shaped CCMV<sub>TT</sub>-VLPs in vivo.** Percentage of different cell populations positive for AF488 labeled  
381 Round and Rod-shaped CCMV<sub>TT</sub>-VLPs in murine popliteal LNs 3h and 24h post injection in footpad: **a**,  
382 CD8<sup>+</sup>CD11c<sup>+</sup> cells; **b**, CD8<sup>+</sup>CD11c<sup>+</sup> cells; **c**, CD11b<sup>+</sup>F4/80<sup>+</sup> cells; **d**, CD45<sup>+</sup>CD11b<sup>+</sup> cells. **e**, CD45<sup>+</sup>Ly6G<sup>+</sup>  
383 cells; **f**, CD45R/B220<sup>+</sup> cells and **g**, CD45R/B220<sup>+</sup> MHC<sup>+</sup> cells. **h**, Representative FACS plots showing  
384 the percentage of CCMV<sub>TT</sub>-VLPs labelled with AF488 in CD45<sup>+</sup>CD11b<sup>+</sup> cells in popliteal LNs 3h post  
385 injection in mouse footpad. **i**, Representative FACS plot showing the percentage of CCMV<sub>TT</sub>-VLPs  
386 labelled with AF488 in CD45R/B220<sup>+</sup> cells in popliteal LNs 3h and 24h post injection in mouse footpad.  
387 Naïve LNs were used as a negative control. **j**, Immunofluorescence of popliteal LNs 3h and 24h post  
388 vaccination with Round or Rod-shaped CCMV<sub>TT</sub>-VLPs labeled with AF488, cryosections were treated  
389 with Abs detecting CD11b<sup>+</sup> cells (red colour) and CD45/B220<sup>+</sup> cells (purple colour). Mean ± SEM, 4  
390 mice per group, one representative of 2 similar experiments is shown.

391

392 **Round-shaped CCMV<sub>TT</sub>-VLPs are more potent in inducing IgG antibodies than Rod-**  
393 **shaped CCMV<sub>TT</sub>-VLPs**

394 In a next step, we have assessed the humoral immune response induced by both  
395 engineered Round and Rod-shaped CCMV<sub>TT</sub>-VLPs. It is important to keep in mind that it is  
396 usually difficult to compare different sized particles for their immunogenicity as for spheres,  
397 the surface is proportional to radius ( $r$ )<sup>2</sup>, while the weight will be proportional to ( $r$ )<sup>3</sup>. Hence the  
398 weight of the injected particles grows much more rapidly than the surface, rendering a  
399 comparison difficult. In contrast, for rods, both the surface and weight are proportional to the  
400 length of the rod, rendering this comparison more appropriate.

401 Hence, C57BL/6 mice were vaccinated subcutaneously (SC) with 15µg of Round or  
402 Rod-shaped CCMV<sub>TT</sub>-VLPs on day 0 and boosted once on day 14 as illustrated in Figure 3a.  
403 Serum was collected on day 0 before vaccination and subsequently on day 7, 14, 21, 28 and  
404 35. Total specific IgG response against Round or Rod-shaped CCMV<sub>TT</sub>-VLPs was assessed  
405 by ELISA. As shown in Fig. 3b and c, the Round-shaped CCMV<sub>TT</sub>-VLPs were very potent at  
406 inducing specific IgG response 7 days following the administration of the first dose. This  
407 response was enhanced dramatically on days 14, 21, 28 and 35. On the contrary, vaccination  
408 with Rod-shaped CCMV<sub>TT</sub>-VLPs was low after the first dose and has been increasing  
409 significantly only following boost on day 14.

410 Even though subunits of both VLPs were almost identical, in order to test the cross-  
411 reactivity of both Round and Rod-shaped CCMV<sub>TT</sub>-VLPs, we have tested the collected sera in  
412 ELISA coated with the opposite VLP shape. Specifically, sera from mice vaccinated with  
413 Round-shaped CCMV<sub>TT</sub>-VLPs were tested against ELISA coated with Rod-shaped CCMV<sub>TT</sub>-  
414 VLPs and vice versa. Our results showed that sera from mice vaccinated with Round-shaped  
415 CCMV<sub>TT</sub>-VLPs are capable of recognizing the Rod-shaped CCMV<sub>TT</sub>-VLPs after a single dose  
416 on day 7. The response was enhanced on day 14, 21, 28 and 35. However, sera from mice

417 vaccinated with Rod-shaped CCMV<sub>TT</sub>-VLPs could only significantly recognize the Round-  
418 shaped CCMV<sub>TT</sub>-VLPs after boosting (Fig. 3d and e). In a next step, we have produced Rod-  
419 shaped CCMV<sub>TT</sub>-VLPs exhibiting variation in lengths that includes smaller fragmented pieces  
420 of less than ~1 $\mu$ m in length (By ways of using polyethylene glycol precipitation instead of  
421 sucrose gradient centrifugation for purification, as described for Round-shaped CCMV<sub>TT</sub>-VLPs  
422

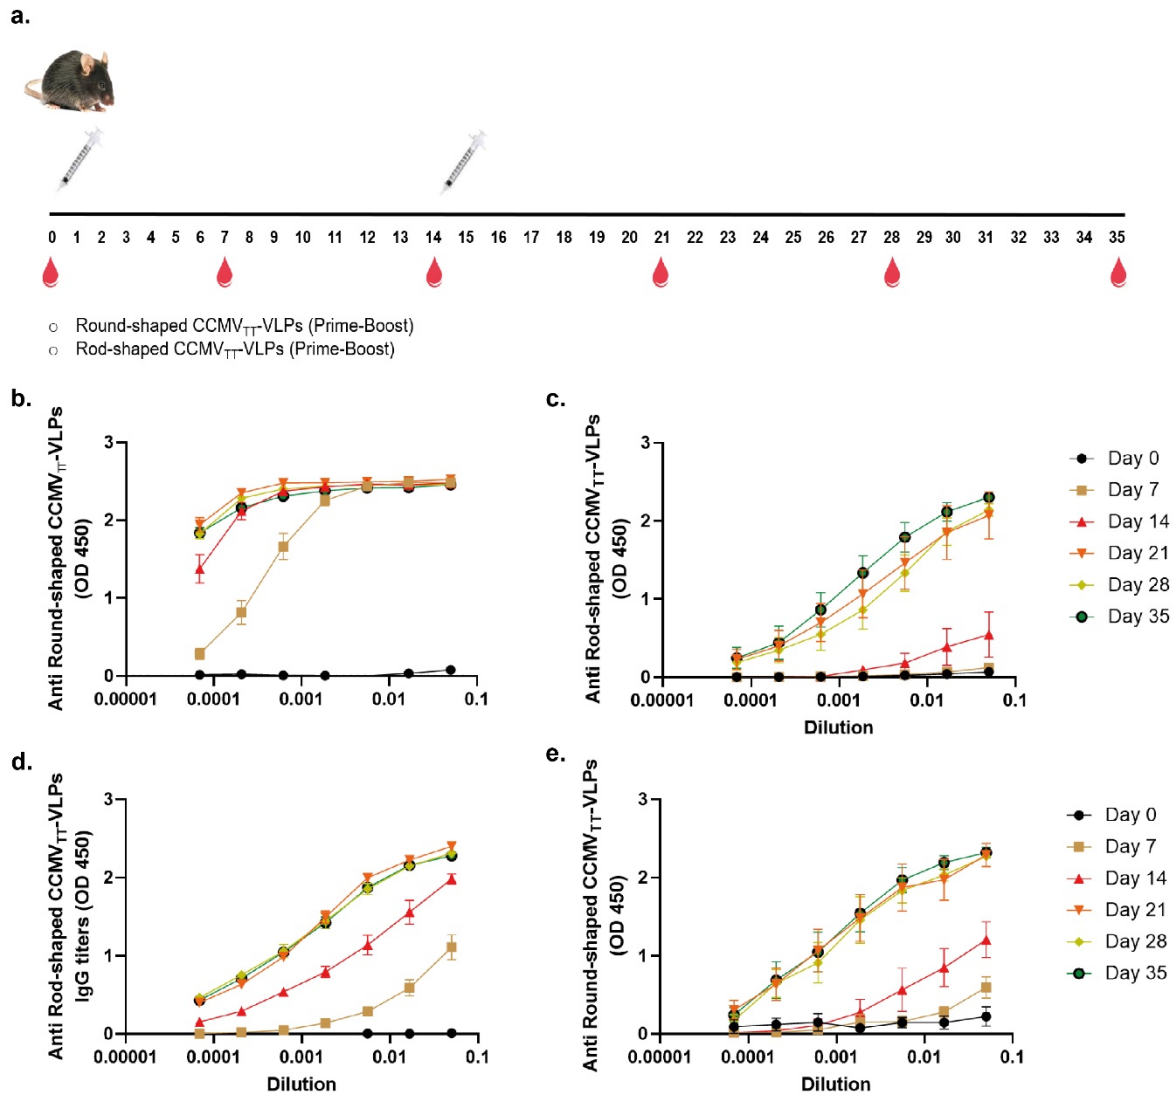

423  
424 **Figure 3: Round-shaped CCMV<sub>TT</sub>-VLPs are more potent in inducing IgG antibodies than Rod-**  
425 **shaped CCMV<sub>TT</sub>-VLPs.** **a**, Vaccination regimen and bleeding time-points. **b**, Sera from Round-shaped  
426 CCMV<sub>TT</sub>-VLP vaccinated mice, ELISA plates coated with Round-shaped CCMV<sub>TT</sub>-VLPs. **c**, Sera from  
427 Rod-shaped CCMV<sub>TT</sub>-VLP vaccinated mice, ELISA plates coated with Rod-shaped CCMV<sub>TT</sub>-VLPs. **d**,  
428 Sera from Round-shaped CCMV<sub>TT</sub>-VLP vaccinated mice, ELISA plates coated with Rod-shaped  
429 CCMV<sub>TT</sub>-VLPs. **e**, Sera from Rod-shaped CCMV<sub>TT</sub>-VLP vaccinated mice, ELISA plates coated with  
430 Round-shaped CCMV<sub>TT</sub>-VLPs. Mean  $\pm$  SEM, 6 mice per group, one representative of 2 similar  
431 experiments is shown.

432 in material & methods; Supplementary Fig. 1). Specific anti-IgG response against the Rod-  
433 shaped

434 CCMV<sub>TT</sub>-VLPs was enhanced substantially, indicating that indeed the rod-length limited the  
435 size of the immune response (Supplementary Fig. 2). In all other experiments presented in  
436 this paper the more homogeneous long Rod-shaped CCMV<sub>TT</sub>-VLPs were used.

437

438 ***Rod-shaped CCMV<sub>TT</sub>-VLPs fail to induce isotype switching in comparison to the Round-***  
439 ***shaped CCMV<sub>TT</sub>-VLPs***

440 The C57BL/6 murine IgG family consists of four major subclasses IgG1, IgG2b, IgG2c  
441 and IgG3. Each unique subclass is implicated in distinct effector functions during humoral  
442 immune responses. VLPs and other nanoparticles induce a humoral response dominated by  
443 IgG1 in the absence of packaged RNA or DNA in mice (26, 33, 34). Isotype switching to the  
444 protective IgG2 subtype is strictly TLR dependent. Thus, VLPs packaged with prokaryotic  
445 ssRNA during *E. coli* production induce a humoral immune response dominated with IgG2  
446 subclasses (35, 36). Based on these grounds, we were interested in characterizing the  
447 different IgG subclasses in mice sera vaccinated with Round vs Rod-shaped CCMV<sub>TT</sub>-VLPs.  
448 As explained earlier the engineered Round and Rod-shaped CCMV<sub>TT</sub>-VLPs package the  
449 same quantity of ssRNA. Therefore, TLR7/8 ligand effect can be eliminated as a confounding  
450 variable and the difference in the induced IgG subclasses can be correlated to the size of the  
451 VLPs. Our analysis revealed that Round-shaped CCMV<sub>TT</sub>-VLPs significantly enhanced all IgG  
452 subclasses compared to the Rod-shaped ones. The difference, however, was most striking  
453 for TLR7/8 related subclasses IgG2b/c and IgG3 (Fig.4a). By performing OD50 analysis we  
454 compared the titers (given as reciprocal dilution values) in both groups as depicted in Figure  
455 4b. Titers are significantly higher ( $p$ . <0.0001 for IgG1, IgG2b and IgG2c) ( $p$ . <0.05 for IgG3)  
456 post immunization with Round-shaped CCMV<sub>TT</sub>-VLPs. The ratio between TH<sub>1</sub> and TH<sub>2</sub>  
457 associated IgG subclasses was calculated next and it became evident that TH<sub>1</sub> contribution is  
458 more pronounced with Round-shaped CCMV<sub>TT</sub>-VLPs (Fig. 4c).



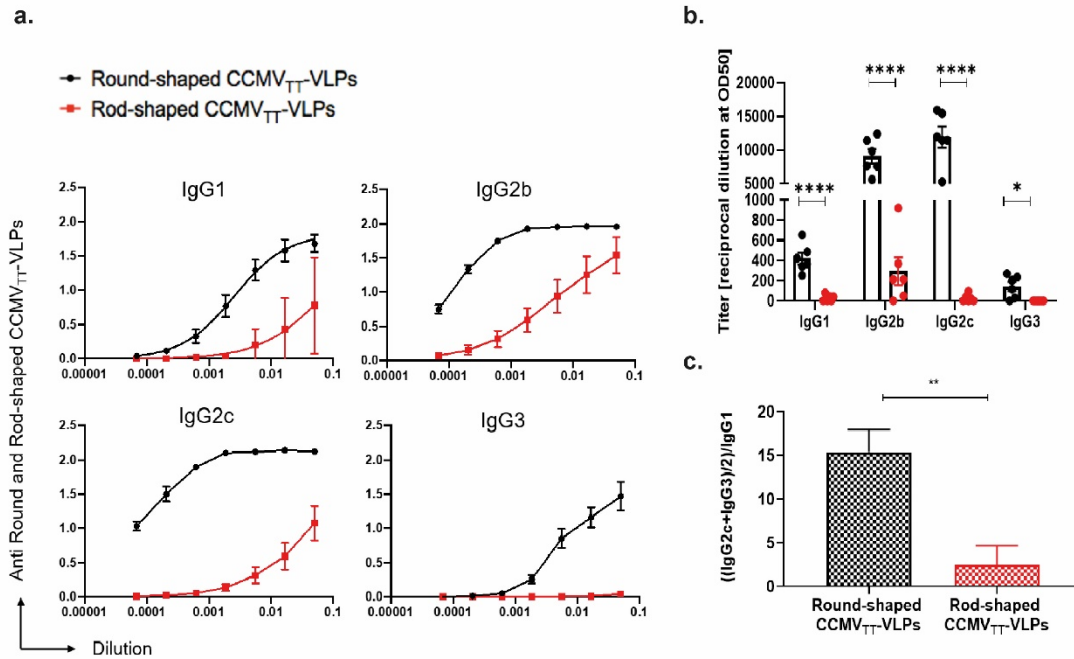

459

460 **Figure 4: Rod-shaped CCMV<sub>TT</sub>-VLPs fail to induce isotype switching in comparison to the**

461 **Round-shaped CCMV<sub>TT</sub>-VLPs. a,** Anti-Round and Rod-shaped CCMV<sub>TT</sub>-VLP specific IgG1, IgG2b,

462 IgG2c and IgG3 titers measured in day 21 mice sera using OD450nm. ELISA plates were coated with

463 Round-shaped CCMV<sub>TT</sub>-VLPs for detecting IgG subclasses in mice vaccinated with Round-shaped

464 CCMV<sub>TT</sub>-VLPs. ELISA plates were coated with Rod-shaped CCMV<sub>TT</sub>-VLPs for detecting IgG

465 subclasses in mice vaccinated with Rod-shaped CCMV<sub>TT</sub>-VLPs. **b,** Anti-Round and Rod-shaped

466 CCMV<sub>TT</sub>-VLP specific IgG1, IgG2b, IgG2c and IgG3 titers measured in day 21 mice sera using OD50

467 calculation of data depicted in a. **c,** TH<sub>1</sub>/TH<sub>2</sub> ratio in Round and Rod-shaped CCMV<sub>TT</sub>-VLP immunized

468 mice depicted as ((IgG2c+IgG3)/2)/IgG1 of OD50 values shown in b. Mean ± SEM, 6 mice per group, one

469 representative of 2 similar experiments is shown.

470

### 471 **Systemic IgA response depends on size of VLPs**

472 Previous studies have shown that SC injection of VLPs packaging RNA leads to a

473 strong IgA response despite the fact that IgA antibodies are TH-cell independent (35). Besides,

474 our previous findings revealed that systemic IgA response is heavily dependent on TLR7/8 in

475 B-cells (37). The role of the size of VLPs packaging similar contents of RNA has not been

476 investigated before, therefore we carried out an experiment to investigate this matter. Our

477 findings indicate that Round-shaped CCMV<sub>TT</sub>-VLPs could induce significantly higher (*p*.

478 <0.0001) isotype switching to IgA when compared to the Rod-shaped ones (Fig. 5a and b).

479 To rule out the role of TH-cells, we have also measured IFN- $\gamma$  in the serum of vaccinated mice

480 on day 14, the results showed no significant difference (*p*. 0.8211) between both groups (Fig.

481 5c).

482

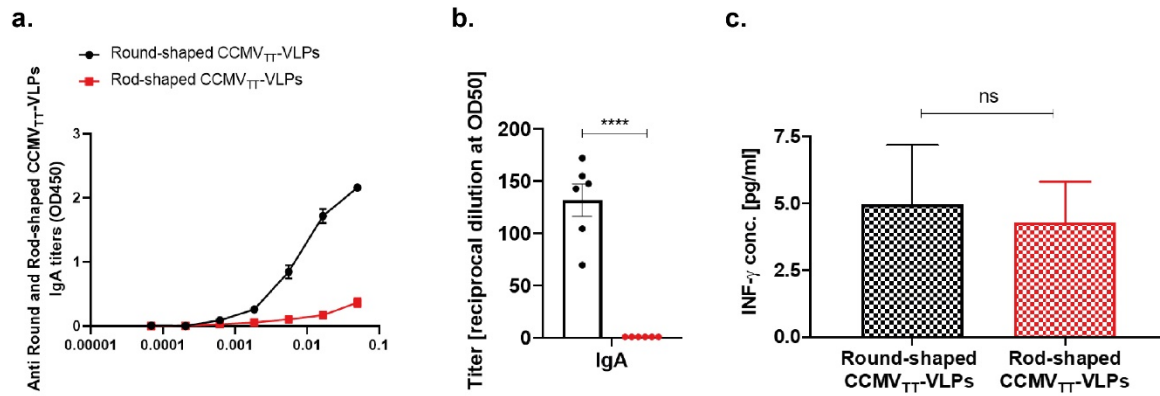

483

484

485

486

487

488

489

490

491

492

493

494

495

496

497

498

499

500

501

502

503

504

505

506

507

**Figure 5. Systemic IgA response depends on size of VLPs.** **a**, Anti-Round and Rod-shaped CCMV<sub>TT</sub>-VLP specific IgA titers measured in day 21 serum from mice vaccinated with Round and Rod-shaped CCMV<sub>TT</sub>-VLPs using OD450nm. **b**, Anti-Round and Rod-shaped CCMV<sub>TT</sub>-VLP specific IgA titers measured using OD50 calculation of data depicted in **a**. **c**, Concentration of IFN- $\gamma$  measured in day 14 serum from mice vaccinated with Round and Rod-shaped CCMV<sub>TT</sub>-VLPs. Mean  $\pm$  SEM, 6 mice per group, one representative of 2 similar experiments is shown.

### **Germinal center formation is prominent following a single dose of Round-shaped CCMV<sub>TT</sub>-VLPs**

Antigen reservoir persisting on follicular dendritic cells (fDCs) is essential for germinal centers (GC) to keep B-cells stimulated and to generate a strong and long-lived antibody response. We therefore studied the formation of GCs in the spleens of mice vaccinated with Round and Rod-shaped CCMV<sub>TT</sub>-VLPs 12 days following a single SC dose of the engineered VLPs. Results showed that the formation of GCs in mice vaccinated with Round-shaped CCMV<sub>TT</sub>-VLPs was significantly higher than in Rod-shaped CCMV<sub>TT</sub>-VLP vaccinated mice when measuring the total number of GCs ( $p$ . 0.0042) or the number of GCs/mm<sup>2</sup> ( $p$ . 0.0033) (Fig. 6a and b). Histological examination of Hematoxylin and Eosin (HE) stained splenic tissue indicated the presence of multiple GCs within the lymphoid follicles upon vaccination with Round-shaped CCMV<sub>TT</sub>-VLPs. On the other hand, mice vaccinated with Rod-shaped CCMV<sub>TT</sub>-VLPs revealed only rare GC formation. Spleens from naïve C57BL/6 mice were used as a control (Fig. 6c and d). The examined spleens in mice vaccinated with Round or Rod-shaped CCMV<sub>TT</sub>-VLPs were free of any relevant degenerative or necrotic histopathological changes.

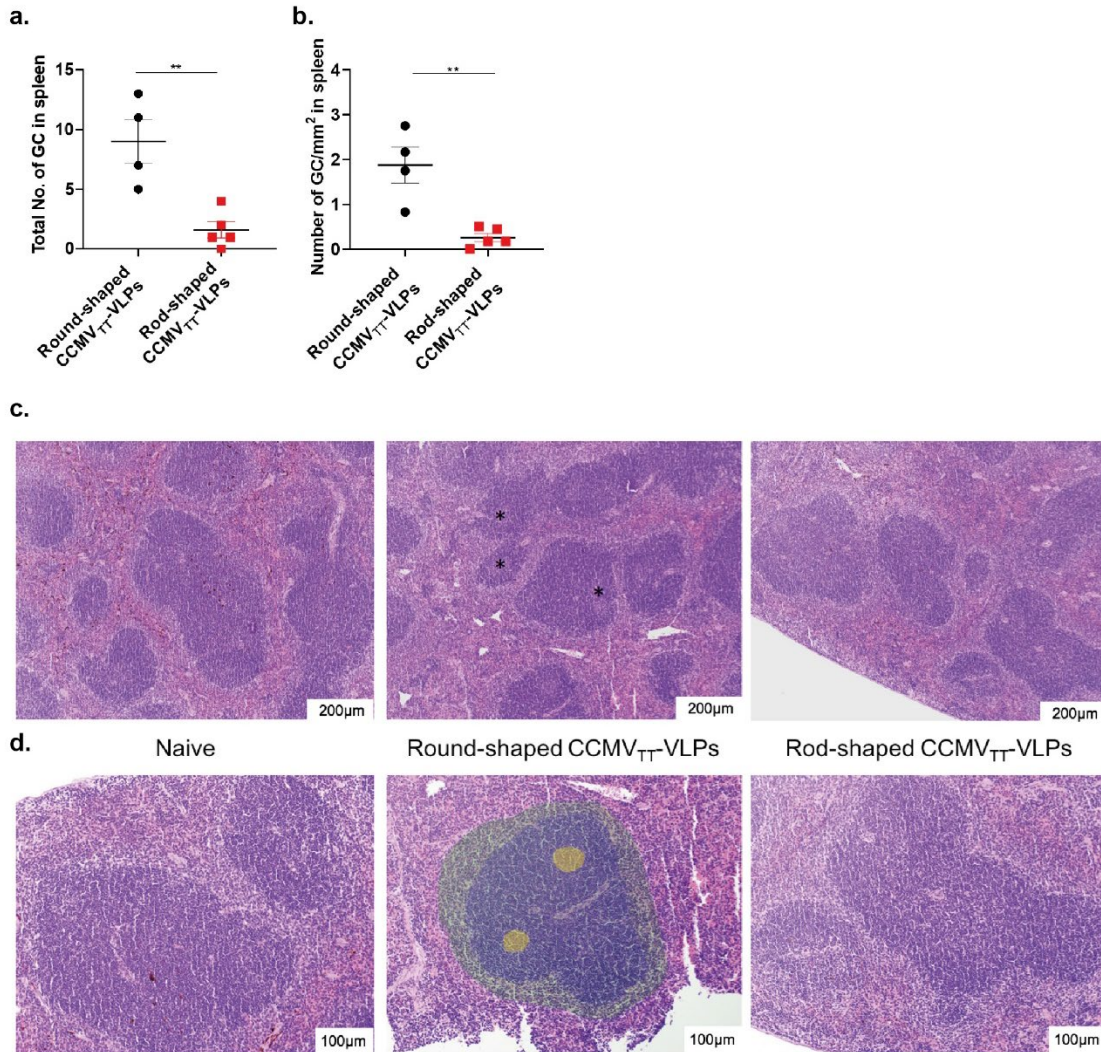

508

509

510

511

512

513

514

515

516

517

518

519

520

521

522

523

524

**Figure 6: Germinal center formation is prominent following a single dose of Round-shaped CCMV<sub>TT</sub>-VLPs.** **a**, Total number of germinal centers (GCs) in the examined splenic tissue fragments of mice vaccinated with a single dose of 15µg of Round or Rod-shaped CCMV<sub>TT</sub>-VLPs. **b**, Number of GCs/mm<sup>2</sup> in spleen of mice vaccinated with a single dose of 15µg of Round-shaped CCMV<sub>TT</sub>-VLPs. **c**, Histology of HE stained murine spleens, 10x objective. From the left: naïve spleen, lymph follicles lack evident GC formation; spleen of mice vaccinated with Round-shaped CCMV<sub>TT</sub>-VLPs, lymph follicle present multifocal GC formation (\*); last spleen of mice vaccinated with Rod-shaped CCMV<sub>TT</sub>-VLPs, lymph follicle lack visible GCs. **d**, Higher magnification of **c**., 20x objective. From the left: naïve spleen, lymph follicles present with densely arranged lymphocytes without evident GC formation; spleen of mice vaccinated with Round-shaped CCMV<sub>TT</sub>-VLPs, GCs (\*) are visible within the lymph follicles, GCs and surrounding follicular and perfollicular zones are highlighted with colours (GCs (yellow), mantle zone (blue) and marginal zone (green)); last spleen of mice vaccinated with Rod-shaped CCMV<sub>TT</sub>-VLPs, lymph follicles present with densely arranged lymphocytes without evident GC formation. Mean ± SEM, 2 splenic tissue fragments were analyzed from naïve group, 4 from Round-shaped CCMV<sub>TT</sub>-VLPs group and 5 from Rod-shaped CCMV<sub>TT</sub>-VLPs group.

525 ***Round and Rod-shaped CCMV<sub>TT</sub>-VLPs enhance neutrophil infiltration in lymph node***  
526 ***sinuses without causing any degenerative or vascular changes.***

527 To study the histopathological effect of Round and Rod-shaped CCMV<sub>TT</sub>-VLPs on LNs,  
528 we have performed histology of HE stained popliteal LNs collected 3h and 24h following  
529 footpad injections. The main histopathological change of the examined LNs was restricted to  
530 a mild to moderate increase of neutrophils within the sinuses, which was present in both  
531 groups and absent or neglectable in control tissue (Table 1 and Fig. 7a-c). This neutrophil  
532 infiltrate was more evident 3h than 24h after injection. No convincing histological difference  
533 was observed between the two groups vaccinated with Round or Rod-shaped CCMV<sub>TT</sub>-VLPs.  
534 Evidence of tissue damage, i.e. degeneration or necrosis, was not observed. The observed  
535 results were consistent with the previous flow cytometry data in Figure 2e which did not show  
536 any statistical difference in the percentage of AF488-labelled VLPs taken up by neutrophils  
537 characterized by CD11b<sup>+</sup>Ly6G<sup>+</sup> 3h or 24h post injection in the footpad.

538

539 **Table 1.** Summary of the relevant histopathological changes in the examined popliteal LNs,  
540 indicated per treatment group.

| Group                                 | Time | Neutrophil infiltrate |           |            |
|---------------------------------------|------|-----------------------|-----------|------------|
|                                       |      | Absent or neglectable | Mild      | Moderate   |
| Naive                                 | -    | 1/1 (100%)            | 0/1       | 0/1        |
| Naive                                 | -    | 1/1 (100%)            | 0/1       | 0/1        |
| Round-shaped CCMV <sub>TT</sub> -VLPs | 3h   | 0/3                   | 0/3       | 3/3 (100%) |
| Rod-shaped CCMV <sub>TT</sub> -VLPs   | 3h   | 0/2                   | 0/2       | 2/2 (100%) |
| Round-shaped CCMV <sub>TT</sub> -VLPs | 24h  | 0/4                   | 2/4 (50%) | 2/4 (50%)  |
| Rod-shaped CCMV <sub>TT</sub> -VLPs   | 24h  | 0/4                   | 2/4 (50%) | 2/4 (50%)  |

541

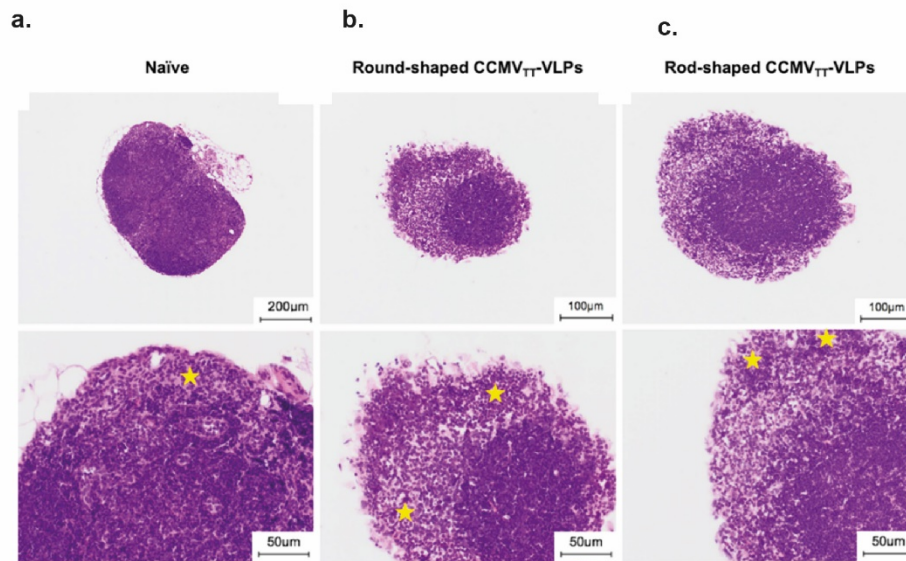

542

543 **Figure 7. Round and Rod-shaped CCMV<sub>TT</sub>-VLPs enhance neutrophil infiltration in lymph node**

544 **sinuses without causing any degenerative or vascular changes. a, Top: Naïve popliteal LN 10x**

545 **objective, HE stain, Bottom: Closer view of Naïve popliteal LN. Within the sinuses (\*), granulocytes are**

546 **rare. 40x objective, HE stain. b, Top: Popliteal LN, 3h after footpad injection with Round-shaped**

547 **CCMV<sub>TT</sub>-VLPs. 20x objective, HE stain, Bottom: Closer view of popliteal LN, 3h after footpad injection**

548 **with Round-shaped CCMV<sub>TT</sub>-VLPs. Moderate predominantly neutrophil infiltration in the subcapsular**

549 **sinus (\*). 40x objective, HE stain. c, Top: Popliteal LN, 3h after footpad injection with Rod-shaped**

550 **CCMV<sub>TT</sub>-VLPs, 20x objective, HE stain. Bottom: Closer view of popliteal LN, 3h after footpad injection**

551 **with Rod-shaped CCMV<sub>TT</sub>-VLPs. Moderate predominantly neutrophil infiltration in the subcapsular**

552 **sinus (\*). 40x objective, HE stain.**

553

554

## Discussion

555 In the current study we have engineered VLPs with nearly identical primary sequence

556 but fundamentally different structural properties; one forming round icosahedrons with a

557 diameter of around 30nm while the other formed rods of about ~1µm. To this end, we inserted

558 a universal tetanus toxoid (TT) epitope at the N or C-terminus of cowpea chlorotic mottle virus

559 (CCMV)-VLPs. The insertion of TT epitope at the N-terminus did not interfere with the original

560 parental structure and resulted in icosahedral particles T=3; named in this study as Round-

561 shaped CCMV<sub>TT</sub>-VLPs. However, inserting TT epitope at the C-terminus of CCMV<sub>TT</sub>-VLPs

562 caused the formation of Rod-shaped CCMV<sub>TT</sub>-VLPs of ~1µm in length and ~30nm in width.

563 As both engineered VLPs were expressed in *E. coli*, they packaged a similar quantity of

564 ssRNA serving as TLR7/8 agonists recognized by PRRs for effective stimulation of the innate

565 immune system. This allowed us to study the impact of size on drainage dynamics and the

566 magnitude of the induced immune responses with one and the same VLP monomer while

567 excluding the effect of TLR7/8 ligands. As mentioned above, both the surface and mass of  
568 rods are proportional to the diameter and length, allowing to vary the surface exposed to B  
569 cells with a proportional change in mass.

570 B-cell activation by antigens is a critical step for effective initiation of the adaptive  
571 immune response (38). Particulate antigens like VLPs can be passively or actively transported  
572 to the lymphoid organs following injection. The passive transportation is based on their ability  
573 to drain freely through the lymphatic vessels since they have an ideal size of ~30-50nm. Our  
574 previous studies have proven that icosahedral VLPs such as bacteriophage Q $\beta$ -VLPs and  
575 VLPs derived from cucumber-mosaic virus (CuMV-VLPs) can freely reach the draining LN in  
576 less than a minute, both having a size of ~30nm (6, 7, 39). By contrast, particulate antigens  
577 larger than 500nm cannot efficiently enter the lymphatic capillaries (40, 41). Instead, they need  
578 to be actively transported via specialized cells (42). To visualize the trafficking kinetics of the  
579 engineered Round and Rod-shaped CCMV<sub>TT</sub>-VLPs (~30nm and ~1 $\mu$ m) respectively, they  
580 were labelled with AF488 and injected in mouse footpads. Flow cytometric analysis and  
581 cryosections of the popliteal LNs 3h and 24h post injection were performed. The results  
582 demonstrate more efficient drainage of the Round-shaped CCMV<sub>TT</sub>-VLPs via the lymphatic  
583 vessels, which have pores of ~200nm, 3h following injection in the footpad in comparison with  
584 the Rod-shaped ones. Nevertheless, Rod-shaped CCMV<sub>TT</sub>-VLPs have also been detected in  
585 the draining popliteal LN 3h post injection in the mouse footpad. This observation may be  
586 explained by 2 scenarios: 1) Rod-shaped CCMV<sub>TT</sub>-VLPs exhibit a width of ~30nm which may  
587 allow them to drain into the lymphatic capillaries despite their length. Indeed, if spheres of  
588 >500nm size are used for injection, these spheres required 24 hours to arrive in LNs and fully  
589 depend on cellular transport (43) and 2) our FACS analysis data indicates that neutrophils  
590 characterized by CD11b<sup>+</sup> Ly6G<sup>+</sup> can also actively transport both engineered VLPs in a similar  
591 manner.

592 Different subsets of APCs participated in uptake Round or Rod-shaped CCMV<sub>TT</sub>-VLPs upon  
593 injection in mouse footpads. Both lymphoid-resident DCs, CD8<sup>+</sup>CD11c<sup>+</sup> and CD8<sup>+</sup>CD11c<sup>+</sup>,  
594 were more efficient at transporting Round-shaped CCMV<sub>TT</sub>-VLPs. Generally, CD8<sup>+</sup> DCs are  
595 more potent in cross-presenting VLP-derived antigens (44). The subcapsular sinus  
596 macrophages are considered the frontline cells to capture pathogens in the draining LN and  
597 retain them from entering the LN parenchyma. Afterwards they relay the antigen to B-cells for  
598 efficient priming and induction of humoral immune responses (45). Yolanda, et al. proposed a  
599 model for particulate-antigen acquisition by B-cells. The model suggests that particulate  
600 antigens firstly accumulate in the macrophage-niche area in the SCS of the draining LN  
601 followed by a still unknown filtration process of the antigens to the follicle. Next, non-antigen  
602 specific B-cells carry particulate antigens from the SCS to be deposited on FDCs (39). Our

603 fluorescent microscopy cryosections could demonstrate such findings as Round-shaped  
604 CCMV<sub>TT</sub>-VLPs were more efficient in draining to the popliteal LNs 3h post injection in the  
605 mouse footpad where macrophages could also be abundantly observed. 24h later the Round-  
606 shaped CCMV<sub>TT</sub>-VLPs could be detected deeper in the LN. The binding of the Round-shaped  
607 CCMV<sub>TT</sub>-VLPs by B-cells was significantly higher ( $p. <0.0001$ ) when compared to the Rod-  
608 shaped CCMV<sub>TT</sub>-VLPs, both at 3h and 24h post injection in the footpad as shown using FACS  
609 analysis. This is consistent with our previous observation that Round-shaped VLPs bind to B  
610 cells in a complement and CD21-dependent manner (46).

611 The repetitive surface geometry of VLPs enhance their cross-linking to B-cells and  
612 ability to activate complement (38). T=3 VLPs are capable of cross-linking 180 BCRs resulting  
613 in a strong humoral immune response. T=3 VLPs may be favorable over T=1 as the later can  
614 cross-link ~60 BCRs which is at the threshold for an optimal immune response (47). However,  
615 data are scarce in regard to rod-shaped VLPs and their ability to activate B cells. In this study,  
616 we show that a single priming injection of Round-shaped CCMV<sub>TT</sub>-VLPs was efficient at  
617 inducing a high specific Ab titer which was further enhanced upon boosting on day 14. On the  
618 contrary, the Rod-shaped CCMV<sub>TT</sub>-VLPs could only induce a specific Ab response following  
619 boosting on day 14 which remained much reduced compared to the Round-shaped VLP  
620 induced response. These results were confirmed by the significantly increased formation of  
621 total no. of GCs ( $p. 0.0042$ ) as well as no. of GCs/mm<sup>2</sup> ( $p. 0.0033$ ) in spleens 12 days following  
622 vaccination with Round-shaped CCMV<sub>TT</sub>-VLPs.

623 When testing the vaccinated mice sera against the opposite engineered VLPs, Round-  
624 shaped CCMV<sub>TT</sub>-VLPs were also more efficient in recognizing the Rod-shaped ones even  
625 after a single dose. These data indicate that icosahedral VLPs are capable of inducing specific  
626 Ab directed against other forms of the same VLPs in an efficient manner and that 30nm sized  
627 round VLPs are far superior over 1 $\mu$ m sized rods.

628 To achieve successful IgG class-switching and memory formation in B cells, co-  
629 delivery of innate immune stimuli is crucial (18). It has been shown that class-switching to  
630 IgG2a/c and IgG2b is dependent on simultaneous engagement of BCR and TLR9 after  
631 immunization with particulate antigens (48, 49). Furthermore, TLR7 engagement with different  
632 RNA types influenced the outcome of the humoral immune response to VLP immunization.  
633 Bacterial RNA pointed the immune response toward IgG2 production, whereas eukaryotic  
634 RNA induced responses favored high IgG1 titers (50). IgG1 is associated with TH<sub>2</sub> responses,  
635 whereas IgG2a/c and IgG3 is associated with TH<sub>1</sub> responses even though TLR-signaling in B  
636 cells is key for IgG subclass induction. The obtained data reveal that Round-shaped CCMV<sub>TT</sub>-  
637 VLPs were more efficient than the rod-shaped at inducing class-switching. Furthermore, the  
638 ratio between TH<sub>1</sub> and TH<sub>2</sub> associated IgG subclasses was more significant ( $p. 0.0045$ ) when

639 vaccinating with Round-shaped CCMV<sub>TT</sub>-VLPs, indicating that rod-shaped VLPs are less  
640 effective at driving TLR7-signaling.

641         Similar to IgG2a responses, VLPs packaged with RNA lead to a strong systemic IgA  
642 response. We have shown previously that IgA response is TH cell independent (35) and  
643 requires TLR7/8 or 9 to induce a systemic response (37). Here, we show that the systemic  
644 IgA response measured on day 21 using a SC prime-boost regimen was much higher in mice  
645 vaccinated with Round-shaped CCMV<sub>TT</sub>-VLPs than in mice vaccinated with Rod-shaped  
646 CCMV<sub>TT</sub>-VLPs ( $p < 0.0001$ ). Hence, these results also support that TLR7-signaling in B cells  
647 is inferior if rods are used for immunization.

648         The histologic analysis of LNs after immunization with either Round or Rod-shaped  
649 CCMV<sub>TT</sub>-VLPs showed an increased number of predominantly neutrophils which were  
650 interpreted to correspond to draining leukocytes through the sinuses. The term 'infiltrate' is  
651 preferred over the term 'inflammation' (i.e. lymphadenitis) due to the lack of degenerative or  
652 vascular changes in the examined LNs (51, 52). Neutrophil infiltrate was more evident in the  
653 tissues sampled 3h than in those sampled 24h post injection, in agreement with the known  
654 rapid recruitment of these cells to sites of infection or tissue injury and the short half-lives of  
655 neutrophils (53). Increased numbers of neutrophils were absent or neglectable in the  
656 examined control LN tissue, which makes a background lesion unlikely. No evident histological  
657 difference was observed between the LNs corresponding to the two groups of Round or Rod-  
658 shaped CCMV<sub>TT</sub>-VLPs, indicating that both types of VLPs effectively recruit neutrophils.

659         Taken together, our data demonstrate that antigen size is a key determinant of  
660 immunogenicity and that icosahedral antigens of ~30nm in diameter are far more  
661 immunogenic than essentially the same viral capsid protein assembled into  $\mu\text{m}$  sized rods.  
662 Trafficking from injection site to LNs as well as trafficking within LNs and direct interaction with  
663 B cells explain the difference.

664

#### 665 Acknowledgment:

666 This work was supported by Qatar National Research Fund (PDRA grant PDRA4-0118-  
667 18002), the Swiss National Science Foundation (SNF 310030\_185114 and SNF  
668 310030\_179165) and by Latvian Science Council (Grant No. Izp-2019/1-0131).

#### 669 Declaration of interests:

670 The authors declare no competing interests

#### 671 References

- 672 1. Crick FH, Watson JD. Structure of small viruses. *Nature*. 1956;177(4506):473-5.
- 673 2. Caspar DL. Movement and self-control in protein assemblies. *Quasi-equivalence*  
674 *revisited*. *Biophys J*. 1980;32(1):103-38.
- 675 3. Louten J. *Essential Human Virology* 2017. 344 p.



- 676 4. Gomes AC, Mohsen M, Bachmann MF. Harnessing Nanoparticles for  
677 Immunomodulation and Vaccines. *Vaccines* (Basel). 2017;5(1).
- 678 5. Gretz JE, Norbury CC, Anderson AO, Proudfoot AE, Shaw S. Lymph-borne  
679 chemokines and other low molecular weight molecules reach high endothelial venules via  
680 specialized conduits while a functional barrier limits access to the lymphocyte  
681 microenvironments in lymph node cortex. *J Exp Med*. 2000;192(10):1425-40.
- 682 6. Mohsen MO, Gomes AC, Cabral-Miranda G, Krueger CC, Leoratti FM, Stein JV, et  
683 al. Delivering adjuvants and antigens in separate nanoparticles eliminates the need of  
684 physical linkage for effective vaccination. *J Control Release*. 2017;251:92-100.
- 685 7. Mohsen MO, Heath MD, Cabral-Miranda G, Lipp C, Zeltins A, Sande M, et al.  
686 Correction to: Vaccination with nanoparticles combined with micro-adjuvants protects  
687 against cancer. *J Immunother Cancer*. 2019;7(1):137.
- 688 8. Caspar DL, Klug A. Physical principles in the construction of regular viruses. *Cold  
689 Spring Harb Symp Quant Biol*. 1962;27:1-24.
- 690 9. Mohsen MO, Augusto G, Bachmann MF. The 3Ds in virus-like particle based-  
691 vaccines: "Design, Delivery and Dynamics". *Immunol Rev*. 2020.
- 692 10. Wang JW, Roden RB. Virus-like particles for the prevention of human  
693 papillomavirus-associated malignancies. *Expert Rev Vaccines*. 2013;12(2):129-41.
- 694 11. Guu TS, Liu Z, Ye Q, Mata DA, Li K, Yin C, et al. Structure of the hepatitis E virus-  
695 like particle suggests mechanisms for virus assembly and receptor binding. *Proc Natl Acad  
696 Sci U S A*. 2009;106(31):12992-7.
- 697 12. Ho JK, Jeevan-Raj B, Netter HJ. Hepatitis B Virus (HBV) Subviral Particles as  
698 Protective Vaccines and Vaccine Platforms. *Viruses*. 2020;12(2).
- 699 13. Chapman ML, L. *Advances in Protein Chemistry* 2003. 1-253 p.
- 700 14. Ge P, Zhou ZH. Hydrogen-bonding networks and RNA bases revealed by cryo  
701 electron microscopy suggest a triggering mechanism for calcium switches. *Proceedings of the  
702 National Academy of Sciences*. 2011;108(23):9637.
- 703 15. Zhang Y, Dong YX, Zhou JH, Li X, Wang F. Application of Plant Viruses as a  
704 Biotemplate for Nanomaterial Fabrication. *Molecules*. 2018;23(9).
- 705 16. Balke I, Zeltins A. Recent Advances in the Use of Plant Virus-Like Particles as  
706 Vaccines. *Viruses-Basel*. 2020;12(3).
- 707 17. Cielens I, Ose V, Petrovskis I, Strelnikova A, Renhofa R, Kozlovska T, et al.  
708 Mutilation of RNA phage Qbeta virus-like particles: from icosahedrons to rods. *FEBS Lett*.  
709 2000;482(3):261-4.
- 710 18. Jennings GT, Bachmann MF. The coming of age of virus-like particle vaccines in:  
711 *Biological Chemistry* Volume 389 Issue 5 (2008). *Biological Chemistry*, Volume 389: Issue  
712 52008.
- 713 19. Jennings GT, Bachmann MF. Immunodrugs: Therapeutic VLP-Based Vaccines for  
714 Chronic Diseases. *Annual Review of Pharmacology and Toxicology: Annual Reviews*; 2009.  
715 p. 303-26.
- 716 20. Cabral-Miranda G, Lim SM, Mohsen MO, Pobelov IV, Roesti ES, Heath MD, et al.  
717 Zika Virus-Derived E-DIII Protein Displayed on Immunologically Optimized VLPs Induces  
718 Neutralizing Antibodies without Causing Enhancement of Dengue Virus Infection. *Vaccines  
719 (Basel)*. 2019;7(3).
- 720 21. Olomski F, Fettelschoss V, Jonsdottir S, Birkmann K, Thoms F, Marti E, et al.  
721 Interleukin 31 in insect bite hypersensitivity-Alleviating clinical symptoms by active  
722 vaccination against itch. *Allergy*. 2020;75(4):862-71.
- 723 22. Fettelschoss-Gabriel A, Fettelschoss V, Olomski F, Birkmann K, Thoms F, Buhler M,  
724 et al. Active vaccination against interleukin-5 as long-term treatment for insect-bite  
725 hypersensitivity in horses. *Allergy*. 2019;74(3):572-82.

- 726 23. Thoms F, Jennings GT, Maudrich M, Vogel M, Haas S, Zeltins A, et al.  
727 Immunization of cats to induce neutralizing antibodies against Fel d 1, the major feline  
728 allergen in human subjects. *J Allergy Clin Immunol.* 2019;144(1):193-203.
- 729 24. Storni F, Zeltins A, Balke I, Heath MD, Kramer MF, Skinner MA, et al. Vaccine  
730 against peanut allergy based on engineered virus-like particles displaying single major peanut  
731 allergens. *J Allergy Clin Immunol.* 2020;145(4):1240-53.e3.
- 732 25. Cabral-Miranda G, M Salman A, O Mohsen M, L Storni F, S Roesti E, A Skinner M,  
733 et al. DOPS Adjuvant Confers Enhanced Protection against Malaria for VLP-TRAP Based  
734 Vaccines. *Diseases (Basel, Switzerland).* 2018;6(4):107.
- 735 26. Pogue GP, Lindbo JA, Garger SJ, Fitzmaurice WP. Making an ally from an enemy:  
736 plant virology and the new agriculture. *Annu Rev Phytopathol.* 2002;40:45-74.
- 737 27. Smith ML, Lindbo JA, Dillard-Telm S, Brosio PM, Lasnik AB, McCormick AA, et  
738 al. Modified tobacco mosaic virus particles as scaffolds for display of protein antigens for  
739 vaccine applications. *Virology.* 2006;348(2):475-88.
- 740 28. Hassani-Mehraban A, Creutzburg S, van Heereveld L, Kormelink R. Feasibility of  
741 Cowpea chlorotic mottle virus-like particles as scaffold for epitope presentations. *Bmc*  
742 *Biotechnol.* 2015;15.
- 743 29. Speir JA, Munshi S, Wang G, Baker TS, Johnson JE. Structures of the native and  
744 swollen forms of cowpea chlorotic mottle virus determined by X-ray crystallography and  
745 cryo-electron microscopy. *Structure*1995. p. 63-78.
- 746 30. Adolph KW, Butler PJ. Studies on the assembly of a spherical plant virus. I. States of  
747 aggregation of the isolated protein. *Journal of molecular biology.* 1974;88(2):327-41.
- 748 31. Zeltins A, West J, Zabel F, El Turabi A, Balke I, Haas S, et al. Incorporation of  
749 tetanus-epitope into virus-like particles achieves vaccine responses even in older recipients in  
750 models of psoriasis, Alzheimer's and cat allergy. *NPJ Vaccines.* 2017;2:30.
- 751 32. Fox JM, Zhao X, Speir JA, Young MJ. Analysis of a salt stable mutant of cowpea  
752 chlorotic mottle virus. *Virology: Academic Press Inc.;* 1996. p. 115-22.
- 753 33. Jennings GT, Bachmann MF. The coming of age of virus-like particle vaccines. *Biol*  
754 *Chem.* 2008;389(5):521-36.
- 755 34. A CG, Roesti ES, El-Turabi A, Bachmann MF. Type of RNA Packed in VLPs  
756 Impacts IgG Class Switching-Implications for an Influenza Vaccine Design. *Vaccines*  
757 *(Basel).* 2019;7(2).
- 758 35. Bessa J, Bachmann MF. T cell-dependent and -independent IgA responses: role of  
759 TLR signalling. *Immunol Invest.* 2010;39(4-5):407-28.
- 760 36. Jegerlehner A, Maurer P, Bessa J, Hinton HJ, Kopf M, Bachmann MF. TLR9  
761 signaling in B cells determines class switch recombination to IgG2a. *J Immunol.*  
762 2007;178(4):2415-20.
- 763 37. Bessa J, Jegerlehner A, Hinton HJ, Pumpens P, Saudan P, Schneider P, et al. Alveolar  
764 macrophages and lung dendritic cells sense RNA and drive mucosal IgA responses. *J*  
765 *Immunol.* 2009;183(6):3788-99.
- 766 38. Bachmann MF, Jennings GT. Vaccine delivery: a matter of size, geometry, kinetics  
767 and molecular patterns. *Nat Rev Immunol.* 2010;10(11):787-96.
- 768 39. Carrasco YR, Batista FD. B cells acquire particulate antigen in a macrophage-rich  
769 area at the boundary between the follicle and the subcapsular sinus of the lymph node.  
770 *Immunity.* 2007;27(1):160-71.
- 771 40. Reddy ST, van der Vlies AJ, Simeoni E, Angeli V, Randolph GJ, O'Neil CP, et al.  
772 Exploiting lymphatic transport and complement activation in nanoparticle vaccines. *Nat*  
773 *Biotechnol.* 2007;25(10):1159-64.

- 774 41. Berk DA, Swartz MA, Leu AJ, Jain RK. Transport in lymphatic capillaries. II.  
775 Microscopic velocity measurement with fluorescence photobleaching. *Am J Physiol.*  
776 1996;270(1 Pt 2):H330-7.
- 777 42. Manolova V, Flace A, Bauer M, Schwarz K, Saudan P, Bachmann MF. Nanoparticles  
778 target distinct dendritic cell populations according to their size. *Eur J Immunol.*  
779 2008;38(5):1404-13.
- 780 43. Manolova V, Flace A, Bauer M, Schwarz K, Saudan P, Bachmann MF. Nanoparticles  
781 target distinct dendritic cell populations according to their size. *European Journal of*  
782 *Immunology.* 2008;38(5):1404-13.
- 783 44. Keller SA, Bauer M, Manolova V, Muntwiler S, Saudan P, Bachmann MF. Cutting  
784 edge: limited specialization of dendritic cell subsets for MHC class II-associated presentation  
785 of viral particles. *J Immunol.* 2010;184(1):26-9.
- 786 45. Louie DAP, Liao S. Lymph Node Subcapsular Sinus Macrophages as the Frontline of  
787 Lymphatic Immune Defense. *Frontiers in Immunology.* 2019;10.
- 788 46. Mohsen MO, Speiser DE, Knuth A, Bachmann MF. Virus-like particles for  
789 vaccination against cancer. *Wiley Interdiscip Rev Nanomed Nanobiotechnol.*  
790 2020;12(1):e1579.
- 791 47. Jegerlehner A, Storni T, Lipowsky G, Schmid M, Pumpens P, Bachmann MF.  
792 Regulation of IgG antibody responses by epitope density and CD21-mediated costimulation.  
793 *Eur J Immunol.* 2002;32(11):3305-14.
- 794 48. Eckl-Dorna J, Batista FD. BCR-mediated uptake of antigen linked to TLR9 ligand  
795 stimulates B-cell proliferation and antigen-specific plasma cell formation. *Blood.*  
796 2009;113(17):3969-77.
- 797 49. Hou B, Saudan P, Ott G, Wheeler ML, Ji M, Kuzmich L, et al. Selective utilization of  
798 toll-like receptor and Myd88 signaling in B cells for enhancement of the antiviral germinal  
799 center response. *Immunity: NIH Public Access;* 2011. p. 375-84.
- 800 50. Gomes AC, Roesti ES, El-Turabi A, Bachmann MF. Type of RNA packed in VLPs  
801 impacts IgG class switching—implications for an influenza vaccine design. *Vaccines: MDPI*  
802 *AG;* 2019.
- 803 51. Willard-Mack CL, Elmore SA, Hall WC, Harleman J, Kuper CF, Losco P, et al.  
804 Nonproliferative and Proliferative Lesions of the Rat and Mouse Hematolymphoid System.  
805 *Toxicologic Pathology.* 2019;47(6):665-783.
- 806 52. Elmore SA. Histopathology of the Lymph Nodes. *Toxicologic Pathology.*  
807 2006;34(5):425-54.
- 808 53. Lok LSC, Dennison TW, Mahbubani KM, Saeb-Parsy K, Chilvers ER, Clatworthy  
809 MR. Phenotypically distinct neutrophils patrol uninfected human and mouse lymph nodes.  
810 *Proc Natl Acad Sci U S A.* 2019;116(38):19083-9.  
811
